# Supplementary material for: Perception into hypoxia selectivity and electronic features of symmetrically substituted bisthiosemicarbazone ligands and their copper complexes: DFT and QM/MM docking
Source: Royal Society of Chemistry journal article supplement (doi:10.1039/c2md20333b), 2013-01-01
Supplement: c2md20333b.pdf [file c2md20333b.pdf]

## Supportive Information

### Perception into Hypoxia Selectivity and Electronic features of Symmetrically Substituted Bisthiosemicarbazone ligands and their Copper Complexes: DFT and QM/MM Docking

Nidhi Chadha<sup>1,2</sup>, Anjani K. Tiwari<sup>1</sup>, Marilyn D. Milton<sup>2</sup>, Anil K. Mishra<sup>1</sup>

<sup>1</sup>Division of Cyclotron and Radiopharmaceutical Sciences, Institute of Nuclear Medicine and Allied Sciences, Brig. S. K. Mazumdar Road, Delhi-110054, India. <sup>2</sup>Department of Chemistry, University of Delhi, Delhi-110054, India.

Figure S.1

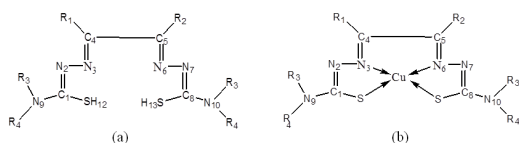

Table S.1: Bisthiosemicarbazone ligands and respective copper complexes

| S.No | Name           | R <sub>1</sub>                  | R <sub>2</sub>                                                  | R <sub>3</sub>  | R <sub>4</sub> |
|------|----------------|---------------------------------|-----------------------------------------------------------------|-----------------|----------------|
| 1    | ATS            | CH <sub>3</sub>                 | CH <sub>3</sub>                                                 | H               | H              |
| 2    | ATSM           | CH <sub>3</sub>                 | CH <sub>3</sub>                                                 | CH <sub>3</sub> | H              |
| 3    | CTS            | CH <sub>2</sub> CH <sub>3</sub> | CH <sub>3</sub>                                                 | H               | H              |
| 4    | DTSM           | CH <sub>2</sub> CH <sub>3</sub> | CH <sub>2</sub> CH <sub>3</sub>                                 | CH <sub>3</sub> | H              |
| 5    | ETS            | H                               | CH <sub>2</sub> CH <sub>3</sub>                                 | H               | H              |
| 6    | <i>i</i> PrTSM | H                               | CH(CH <sub>3</sub> ) <sub>2</sub>                               | CH <sub>3</sub> | H              |
| 7    | <i>n</i> BuTS  | H                               | CH <sub>2</sub> CH <sub>2</sub> CH <sub>2</sub> CH <sub>3</sub> | H               | H              |
| 8    | <i>n</i> BuTSM | H                               | CH <sub>2</sub> CH <sub>2</sub> CH <sub>2</sub> CH <sub>3</sub> | CH <sub>3</sub> | H              |
| 9    | <i>n</i> PrTS  | H                               | CH <sub>2</sub> CH <sub>2</sub> CH <sub>3</sub>                 | H               | H              |
| 10   | <i>n</i> PrTSM | H                               | CH <sub>2</sub> CH <sub>2</sub> CH <sub>3</sub>                 | CH <sub>3</sub> | H              |
| 11   | PhTS           | H                               | C <sub>6</sub> H <sub>5</sub>                                   | H               | H              |
| 12   | GTSM           | H                               | H                                                               | CH <sub>3</sub> | H              |
| 13   | <i>i</i> PrTS  | H                               | CH(CH <sub>3</sub> ) <sub>2</sub>                               | CH <sub>3</sub> | H              |
| 14   | ETSM           | H                               | CH <sub>2</sub> CH <sub>3</sub>                                 | CH <sub>3</sub> | H              |
| 15   | KTS            | H                               | CH(CH <sub>3</sub> )OCH <sub>2</sub> CH <sub>3</sub>            | H               | H              |

|    |                   |                 |                                                      |                                 |                 |
|----|-------------------|-----------------|------------------------------------------------------|---------------------------------|-----------------|
| 16 | KTSM <sub>2</sub> | H               | CH(CH <sub>3</sub> )OCH <sub>2</sub> CH <sub>3</sub> | CH <sub>3</sub>                 | CH <sub>3</sub> |
| 17 | PTS               | H               | CH <sub>3</sub>                                      | C <sub>6</sub> H <sub>5</sub>   | H               |
| 18 | PTSE              | H               | CH <sub>3</sub>                                      | CH <sub>2</sub> CH <sub>3</sub> | H               |
| 19 | PhTSM             | H               | C <sub>6</sub> H <sub>5</sub>                        | CH <sub>3</sub>                 | H               |
| 20 | PTSM <sub>2</sub> | H               | CH <sub>3</sub>                                      | CH <sub>3</sub>                 | CH <sub>3</sub> |
| 21 | CGTS              | Cl              | H                                                    | H                               | H               |
| 22 | DAGTS             | NH <sub>2</sub> | NH <sub>2</sub>                                      | H                               | H               |
| 23 | AGTS              | NH <sub>2</sub> | H                                                    | H                               | H               |
| 24 | HYGTS             | OH              | H                                                    | H                               | H               |
| 25 | NGTS              | CN              | H                                                    | H                               | H               |
| 26 | FGTS              | F               | H                                                    | H                               | H               |
| 27 | MAGTS             | CH <sub>3</sub> | NH <sub>2</sub>                                      | H                               | H               |
| 28 | TFGTS             | CF <sub>3</sub> | H                                                    | H                               | H               |
| 29 | THGTS             | SH              | H                                                    | H                               | H               |
| 30 | PTSM              | H               | CH <sub>3</sub>                                      | CH <sub>3</sub>                 | H               |

Figure S.2

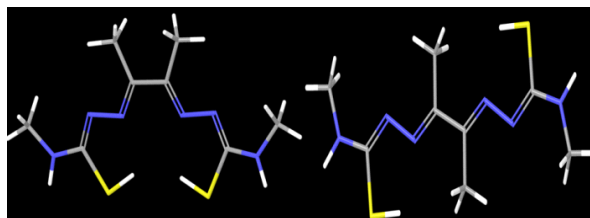

Table S.2: Bond lengths and dihedral angle of obtained optimized geometry of BTSC ligand in their respective stable conformer.

| Ligand         | C <sub>4</sub> -N <sub>3</sub> | C <sub>5</sub> -N <sub>6</sub> | C <sub>4</sub> -C <sub>5</sub> | N <sub>6</sub> -N <sub>7</sub> | N <sub>2</sub> -N <sub>3</sub> | N <sub>7</sub> -C <sub>8</sub> | N <sub>2</sub> -C <sub>1</sub> | C <sub>1</sub> -S | C <sub>8</sub> -S | C-I<br>D(N <sub>3</sub> =C <sub>4</sub> -C <sub>5</sub> =N <sub>6</sub> ) | C-II<br>D(N <sub>3</sub> =C <sub>4</sub> -C <sub>5</sub> =N <sub>6</sub> ) |
|----------------|--------------------------------|--------------------------------|--------------------------------|--------------------------------|--------------------------------|--------------------------------|--------------------------------|-------------------|-------------------|---------------------------------------------------------------------------|----------------------------------------------------------------------------|
| ATS            | 1.280                          | 1.280                          | 1.521                          | 1.430                          | 1.430                          | 1.290                          | 1.290                          | 1.820             | 1.820             | -180.0                                                                    | -                                                                          |
| ATSM           | 1.280                          | 1.280                          | 1.521                          | 1.430                          | 1.430                          | 1.290                          | 1.290                          | 1.820             | 1.820             | -180.0                                                                    | -                                                                          |
| CTS            | 1.282                          | 1.281                          | 1.525                          | 1.430                          | 1.432                          | 1.292                          | 1.292                          | 1.820             | 1.820             | -178.7                                                                    | -                                                                          |
| DTSM           | 1.283                          | 1.282                          | 1.531                          | 1.433                          | 1.432                          | 1.295                          | 1.295                          | 1.820             | 1.820             | 179.3                                                                     | -                                                                          |
| ETS            | 1.273                          | 1.279                          | 1.540                          | 1.432                          | 1.426                          | 1.292                          | 1.292                          | 1.820             | 1.820             | -179.1                                                                    | -                                                                          |
| <i>i</i> PrTSM | 1.281                          | 1.273                          | 1.509                          | 1.430                          | 1.429                          | 1.295                          | 1.296                          | 1.820             | 1.820             | 180.0                                                                     | -                                                                          |
| <i>n</i> BuTS  | 1.283                          | 1.282                          | 1.502                          | 1.430                          | 1.428                          | 1.296                          | 1.296                          | 1.820             | 1.820             | 178.8                                                                     | -                                                                          |
| <i>n</i> BuTSM | 1.273                          | 1.278                          | 1.510                          | 1.433                          | 1.420                          | 1.299                          | 1.296                          | 1.820             | 1.820             | -178.8                                                                    | -                                                                          |
| <i>n</i> PrTS  | 1.275                          | 1.276                          | 1.502                          | 1.431                          | 1.429                          | 1.298                          | 1.296                          | 1.820             | 1.820             | -178.9                                                                    | -                                                                          |
| <i>n</i> PrTSM | 1.281                          | 1.280                          | 1.503                          | 1.440                          | 1.421                          | 1.296                          | 1.296                          | 1.820             | 1.820             | -178.9                                                                    | -                                                                          |
| PhTS           | 1.273                          | 1.282                          | 1.508                          | 1.431                          | 1.427                          | 1.292                          | 1.293                          | 1.820             | 1.820             | -                                                                         | 1.2                                                                        |





**regression, R<sup>2</sup> CV-cross validated R<sup>2</sup> values computed from predictions obtained by leave-out approach,  
 F-variance ratio, P-significance level of variance ratio, RMSE-root-mean-square-error)**

| PLS<br>Factors | SD     | R <sup>2</sup> | R <sup>2</sup> CV | R <sup>2</sup><br>Scramble | Stability | F    | P        | RMSE | Q <sup>2</sup> | Pearson-r |
|----------------|--------|----------------|-------------------|----------------------------|-----------|------|----------|------|----------------|-----------|
| 1              | 0.5137 | 0.6045         | 0.4679            | 0.2828                     | 0.87      | 16.8 | 0.00176  | 0.78 | 0.877          | 0.4428    |
| 2              | 0.3642 | 0.8192         | 0.7105            | 0.1544                     | 0.518     | 22.7 | 0.000193 | 0.77 | 0.9149         | 0.7517    |

**Coordinates and Dihedral angles of Ligands**

| Coordinate | ETS        | CTS       | ATSM       | KTSM2     | nPrTSM    | ATS        |
|------------|------------|-----------|------------|-----------|-----------|------------|
| 0          | -146.92625 | -141.877  | -39.394344 | -102.6659 | -39.53986 | -15.939005 |
| 30         | -125.1016  | -115.2850 | -13.617641 | -81.78154 | -17.96579 | 6.265354   |
| 60         | -70.360855 | -38.58394 | 60.481094  | -26.72821 | 36.213509 | 60.299255  |
| 90         | -30.575834 | 53.878609 | 151.07034  | 17.465866 | 77.117302 | 100.55152  |
| 120        | -72.857956 | -55.88962 | 44.730194  | -9.282027 | 33.384403 | 57.533081  |
| 150        | -127.56783 | -131.2037 | -30.249317 | -68.71504 | -21.15421 | 2.082425   |
| 180        | -150.86466 | -160.0409 | -55.791084 | -92.28125 | -42.34631 | -19.072346 |
| 210        | -129.3757  | -134.3328 | -30.246672 | -73.28241 | -21.18208 | 4.503428   |
| 240        | -73.749413 | -57.89114 | 44.727051  | -21.21128 | 33.611023 | 59.221275  |
| 270        | -30.792019 | 39.845818 | 140.77891  | 20.542046 | 77.378777 | 101.19535  |
| 300        | -70.893562 | -35.54072 | 60.465515  | -23.36406 | 36.39913  | 60.920174  |
| 330        | -124.79399 | -110.9132 | -13.610358 | -79.00495 | -17.88998 | 5.939544   |
| 360        | -146.9243  | -141.8758 | -39.381237 | -102.6657 | -39.51310 | -15.929008 |
| Coordinate | Energy8    | Energy9   | Energy10   | Energy11  | Energy12  | Energy13   |

|            |            |            |            |            |            |            |
|------------|------------|------------|------------|------------|------------|------------|
|            | iPrTSM     | THGTS      | TFGTS      | AGTS       | PHTS       | iPrTS      |
| 0          | -91.943069 | 4.607391   | -174.02164 | -34.47359  | -253.7159  | -117.12515 |
| 30         | -69.010811 | 26.241171  | -151.12894 | -18.33877  | -231.1950  | -95.559616 |
| 60         | -10.865919 | 80.220963  | -93.376678 | 27.115244  | -175.1592  | -41.806793 |
| 90         | 39.644131  | 119.72399  | -45.445251 | 64.750443  | -136.4950  | -2.735753  |
| 120        | -8.923925  | 78.515907  | -93.675163 | 27.18709   | -193.2170  | -44.220196 |
| 150        | -67.801537 | 25.092018  | -152.53711 | -23.87650  | -253.4451  | -97.783371 |
| 180        | -91.074272 | 3.554456   | -175.90149 | -44.43367  | -276.5627  | -119.27749 |
| 210        | -67.795662 | 25.106016  | -152.53706 | -24.04888  | -253.4158  | -97.778946 |
| 240        | -8.918989  | 78.523384  | -93.675468 | 26.941599  | -193.2090  | -44.216232 |
| 270        | 39.641235  | 119.72277  | -45.439877 | 66.564796  | -136.5012  | -2.732561  |
| 300        | -10.873932 | 80.211922  | -93.379326 | 27.116474  | -175.1671  | -41.807098 |
| 330        | -69.013275 | 26.229946  | -151.13181 | -18.34377  | -231.2081  | -95.576553 |
| 360        | -91.939415 | 4.619007   | -174.01988 | -34.57157  | -253.7141  | -117.11656 |
| Coordinate | Energy15   | Energy     | Energy     | Energy     | Energy     | Energy     |
|            | PHTSM      | PTSM2      | NGTS       | nBuTS      | PTSM       | nBuTSM     |
| 0          | 68.295563  | -54.074158 | 47.464462  | -95.691139 | -141.44322 | -52.307514 |
| 30         | 89.113083  | -33.325165 | 69.065262  | -76.496353 | -119.27249 | -30.744736 |
| 60         | 143.550842 | 20.914053  | 123.231079 | -28.259497 | -65.419769 | 23.419743  |
| 90         | 184.272415 | 61.278294  | 164.008774 | 14.406268  | -25.745682 | 64.286652  |
| 120        | 153.389771 | 30.191917  | 120.161156 | -29.038733 | -69.364777 | 20.513868  |
| 150        | 95.88475   | -27.550636 | 65.417496  | -83.966316 | -124.91761 | -34.291969 |
| 180        | 70.595398  | -52.813232 | 44.326778  | -105.76382 | -145.98589 | -55.356556 |
| 210        | 90.765038  | -32.608929 | 65.398064  | -83.967049 | -122.16538 | -34.291069 |
| 240        | 145.671158 | 22.457373  | 120.092041 | -29.067945 | -67.22036  | 20.515463  |
| 270        | 186.867111 | 64.094391  | 164.017944 | 14.677241  | -24.967772 | 64.282906  |
| 300        | 148.851395 | 26.246023  | 123.184631 | -28.26231  | -64.825455 | 23.411217  |
| 330        | 92.681587  | -29.75704  | 69.024834  | -76.517143 | -119.60699 | -30.747513 |
| 360        | 68.320396  | -54.054424 | 47.472019  | -95.68988  | -141.42067 | -52.304726 |
| Coordinate | Energy     | Energy     | Energy     | Energy     | Energy     | Energy     |
|            | GTSM       | PTSE       | DAGTS      | ETSM       | GTS        | DTSM       |
| 0          | -138.0612  | -41.533646 | -48.050308 | -490.90598 | -24.724552 | -98.130768 |
| 30         | -116.23258 | -25.630411 | -26.485735 | -477.10892 | -2.847827  | -87.7808   |
| 60         | -61.446388 | 9.901303   | 27.675184  | -499.04254 | 52.096962  | -62.430302 |
| 90         | -21.572691 | 29.909637  | 68.543259  | -495.78189 | 92.27417   | -50.083965 |
| 120        | -63.802544 | 8.033851   | 24.775557  | -498.10562 | 50.26231   | -75.186272 |
| 150        | -118.70449 | -29.214706 | -30.019558 | -501.3674  | -4.263749  | -113.68472 |
| 180        | -142.37228 | -45.727386 | -51.06881  | -499.6958  | -27.476833 | -130.16173 |
| 210        | -121.138   | -29.212107 | -30.016666 | -500.07721 | -6.053674  | -113.59404 |
| 240        | -65.5233   | 8.037754   | 24.778862  | -498.10062 | 49.406216  | -75.019379 |
| 270        | -22.204401 | 29.896711  | 68.541359  | -495.79929 | 92.052116  | -49.596302 |
| 300        | -62.038708 | 9.897018   | 27.667824  | -499.04172 | 51.527115  | -62.43045  |

| Coordinate | Energy<br>HYGTS | Energy<br>CGTS | Energy<br>KTS | Energy<br>nPrTS | Energy14<br>MAGTS | Energy7<br>FGTS |
|------------|-----------------|----------------|---------------|-----------------|-------------------|-----------------|
| 330        | -115.91211      | -25.635214     | -26.488403    | -498.66495      | -2.543231         | -87.892609      |
| 360        | -138.06027      | -41.531647     | -48.04446     | -490.80664      | -24.721689        | -98.090866      |
| 0          | -154.54393      | -123.88163     | 50.686169     | -19.40011       | -287.79141        | -173.04817      |
| 30         | -150.77327      | -104.13136     | 86.223335     | 2.496899        | -259.76096        | -147.43036      |
| 60         | -117.05648      | -53.857533     | 167.354355    | 57.491009       | -183.77701        | -73.446671      |
| 90         | -77.010933      | -8.452398      | 223.752197    | 97.741486       | -91.29599         | 16.932539       |
| 120        | -114.26485      | -57.819546     | 130.964401    | 55.731689       | -205.42412        | -89.647385      |
| 150        | -162.05563      | -114.57355     | 52.354385     | 0.982031        | -283.57568        | -164.58443      |
| 180        | -180.95195      | -136.8909      | 23.246414     | -22.722664      | -311.16574        | -190.34027      |
| 210        | -162.25674      | -114.57674     | 56.053871     | -1.736149       | -281.8255         | -164.74695      |
| 240        | -114.70486      | -57.868786     | 141.382828    | 53.62051        | -205.35919        | -89.645531      |
| 270        | -71.952225      | -7.878363      | 241.394531    | 96.928284       | -104.69791        | 6.418213        |
| 300        | -117.05653      | -53.858593     | 158.386261    | 56.818405       | -183.79031        | -73.449837      |
| 330        | -150.79596      | -104.24204     | 77.660828     | 2.789661        | -259.7999         | -147.43304      |
| 360        | -154.54443      | -123.88419     | 50.685253     | -19.400032      | -287.79572        | -173.17859      |
